# Supplementary material for: Tumor Microenvironment Modulates Invadopodia Activity of Non-Selected and Acid-Selected Pancreatic Cancer Cells and Its Sensitivity to Gemcitabine and C18-Gemcitabine
Source: MDPI journal article supplement (doi:10.3390/cells13090730), 2024-04-23
Supplement: s1 [file s1]

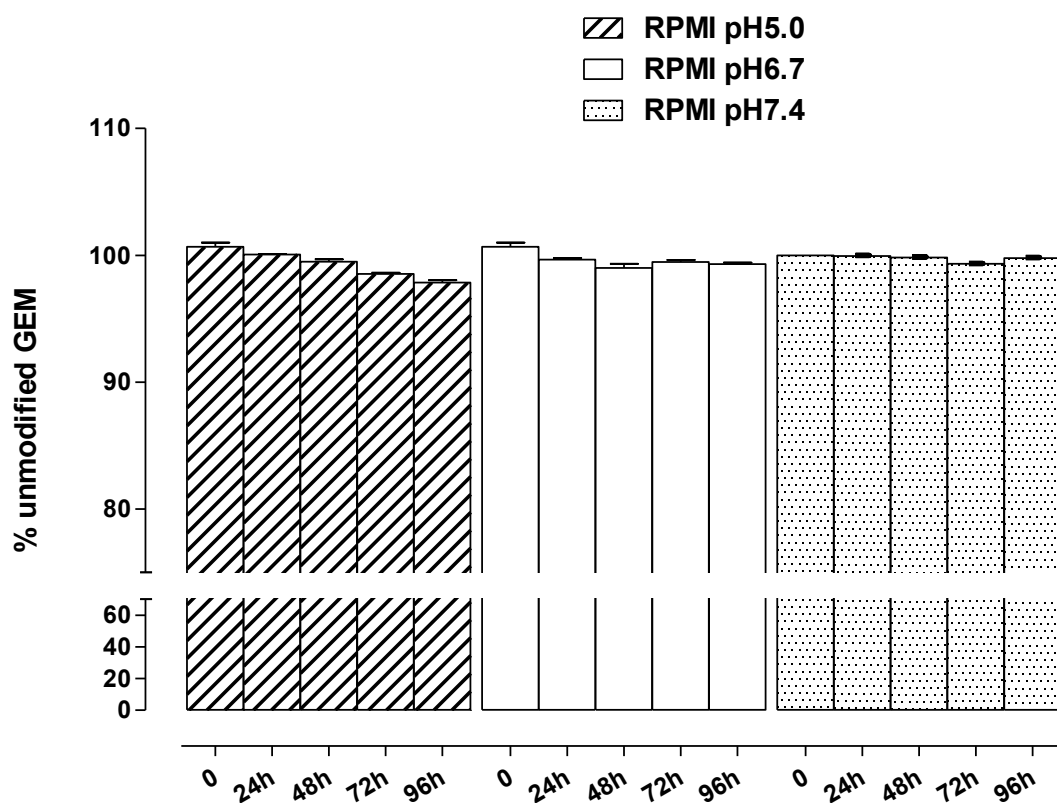

**Figure S1A. Stability of GEM in RMPI 1640 at pH 5,0, 6,7, 7,4 over 96 hours. % of unmodified compound vs time (hours).**

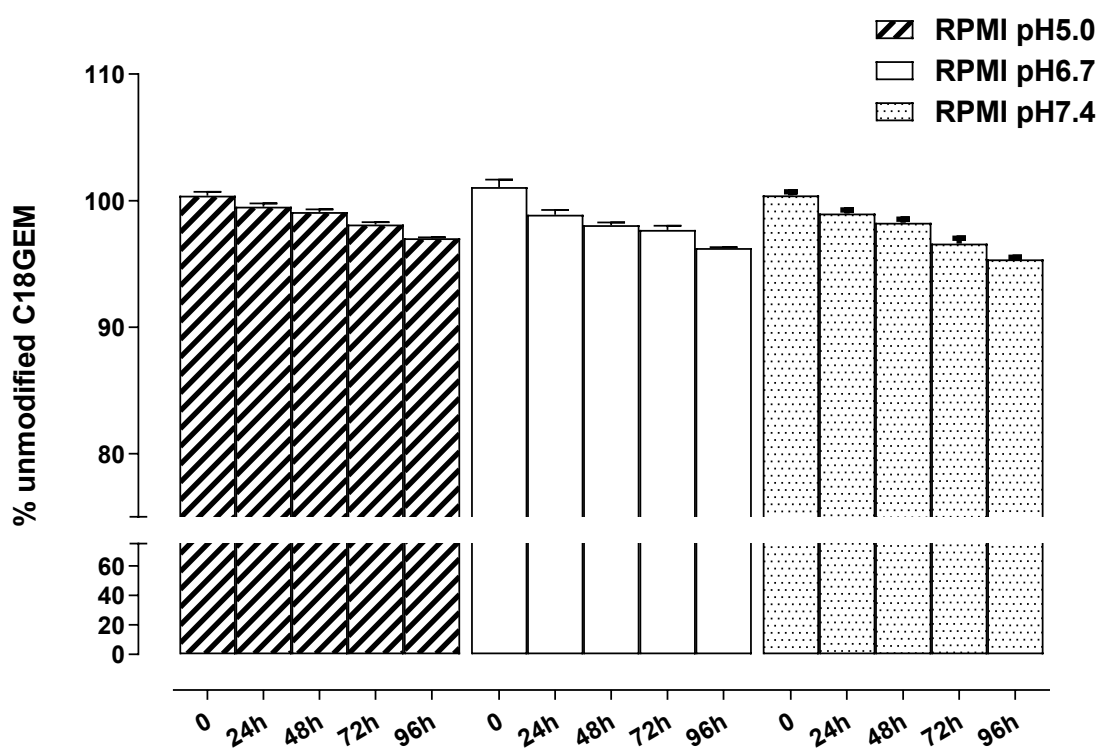

**S1B. Stability of C18GEM prodrug in RMPI 1640 at pH 5,0, 6,7, 7,4 over 96 hours. % of unmodified compound vs time (hours).**

**A**

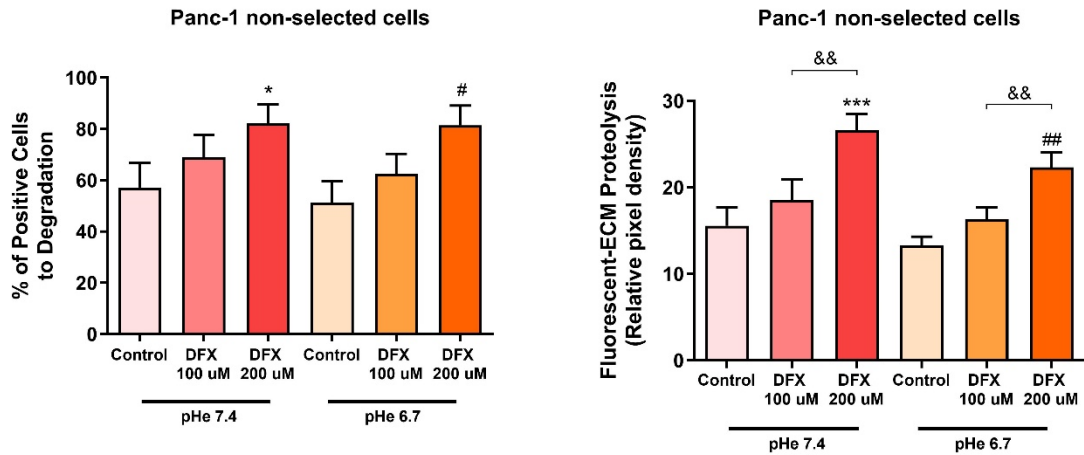

**B**

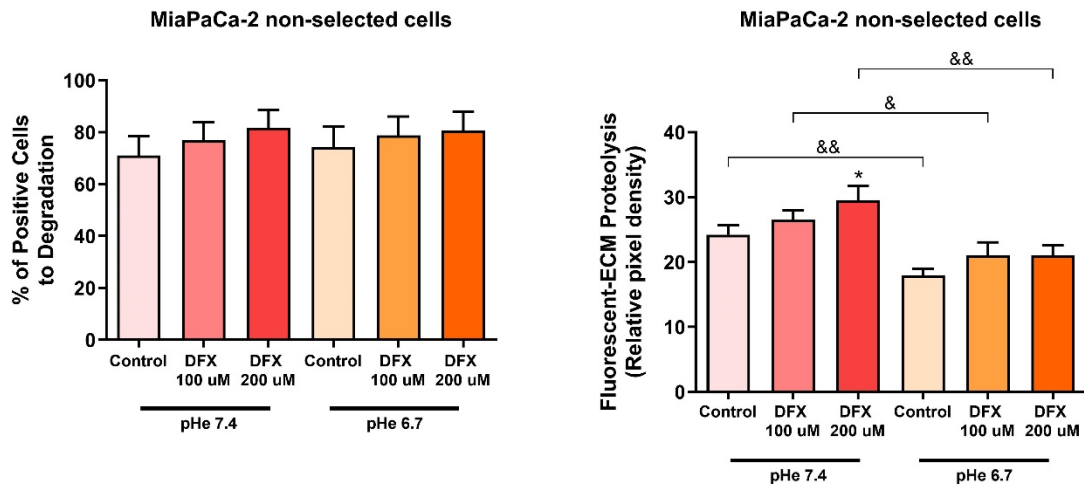

**Figure S2. Effect of both hypoxia and acidic pH<sub>e</sub> on the number of invadopodia-positive cells and their ECM-proteolytic activity/cell in non acid selected Panc-1 cells (A) and MiaPaCa-2 cells (B).** The percentage of cells that formed invadopodia and mean ECM degradation/cell was determined by fluorescence microscopy. Error bars indicate mean  $\pm$  S.E.M (n=3). \* p<0.05; \*\*\* p<0.001 when compared with control pH<sub>e</sub> 7.4; # p<0.05; ## p<0.01 when compared with control pH<sub>e</sub> 6.7; & p<0.05; && p<0.01 when compared within the same treatment between the two different pH<sub>e</sub>.

**A**

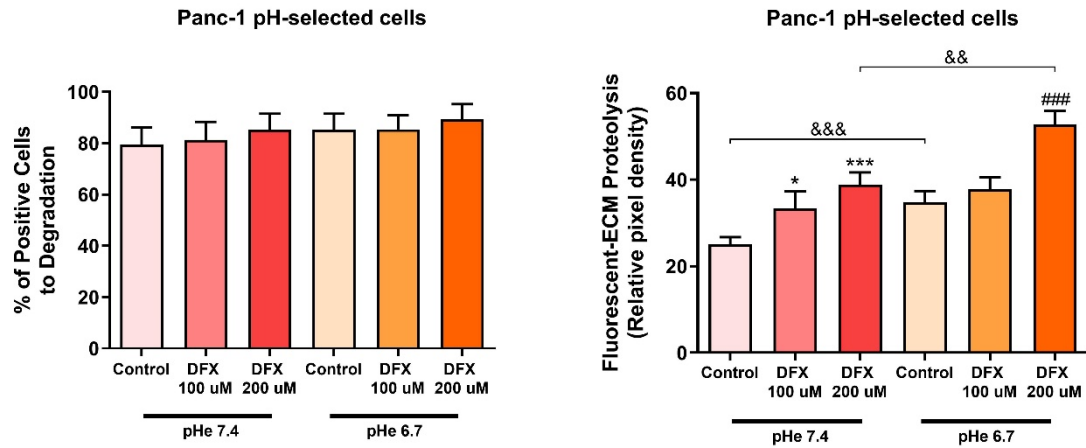

**B**

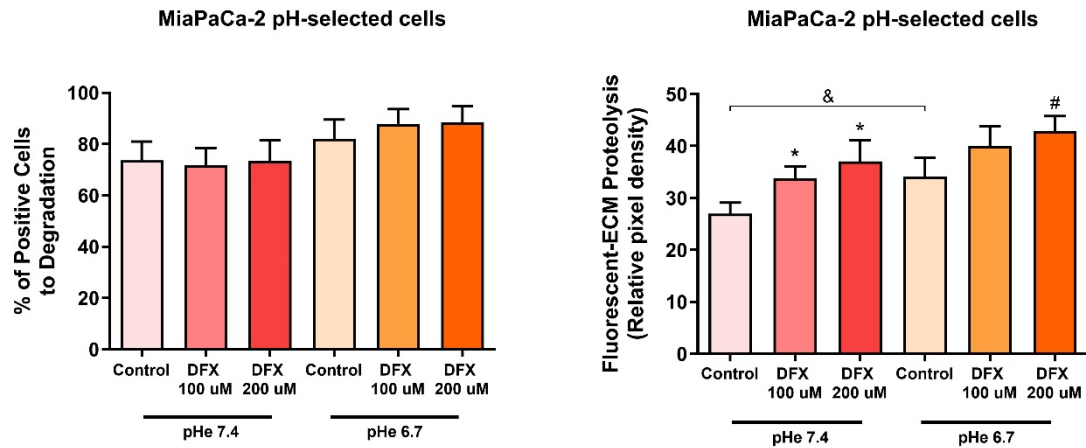

**Figure S3. Effect of both hypoxia and acidic pH<sub>e</sub> on the number of invadopodia-positive cells and their ECM-proteolytic activity/cell in Panc-1 pH-selected cells (A) and MiaPaCa-2 pH-selected cells (B).** The percentage of invadopodia positive cells and their mean ECM degradation/cell was determined by fluorescence microscopy. Error bars indicate mean  $\pm$  S.E.M (n=3). \* p<0.05; \*\*\* p<0.001 when compared with control pH<sub>e</sub> 7.4; # p<0.05; ### p<0.001 when compared with control pH<sub>e</sub> 6.7; & p<0.05 && p<0.01 when compared within the same treatment between the two different pH<sub>e</sub>.

**Figure S4. Effect of GEM and C18 on Invadopodia in normoxia and hypoxia.** These panels show typical images related to the experiments of Figure 5 of proteolytic digestion in green and actin in red. The white bar in the upper right (CTRL) panel of each cell line represents 50µm.

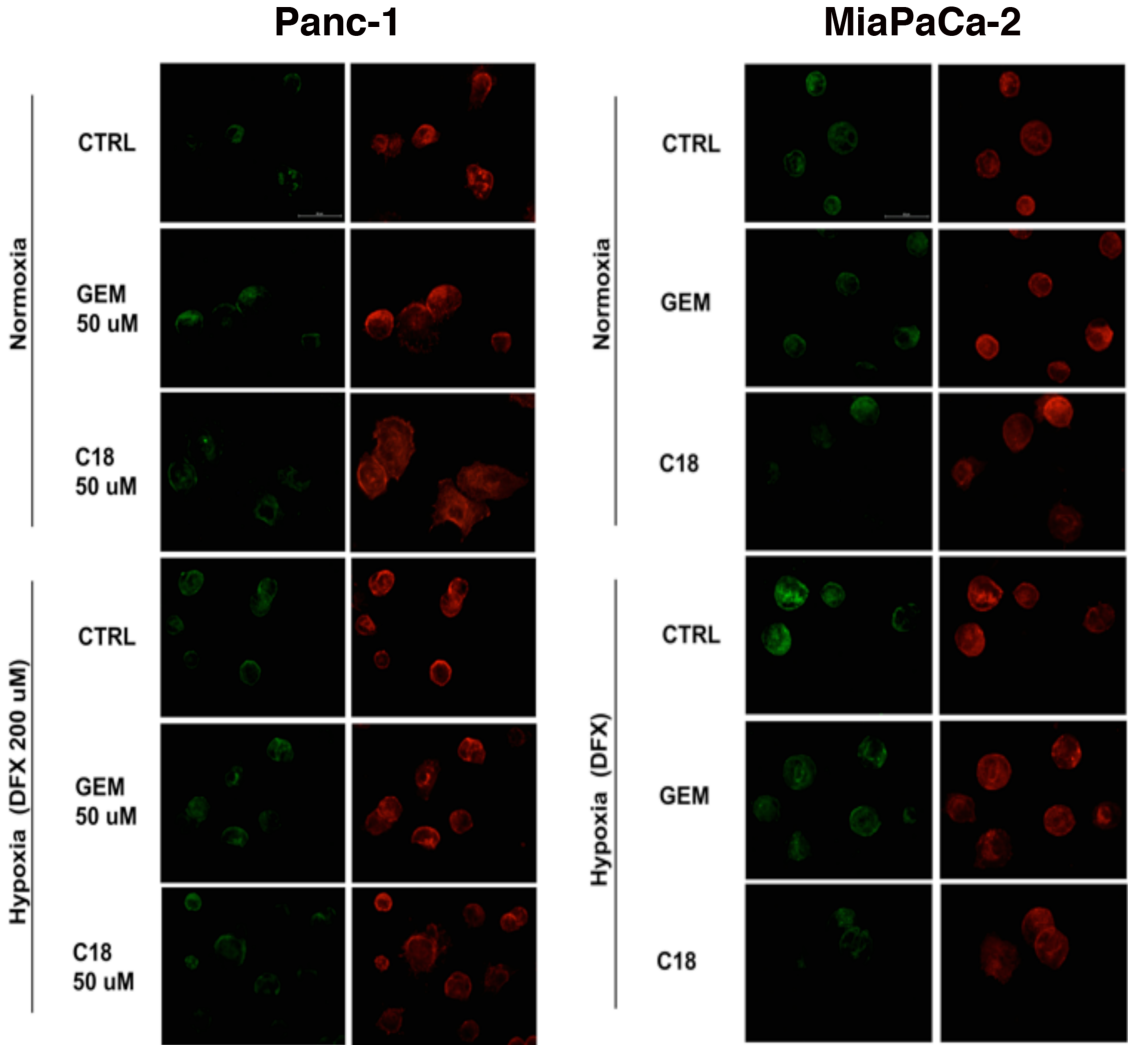

**A**

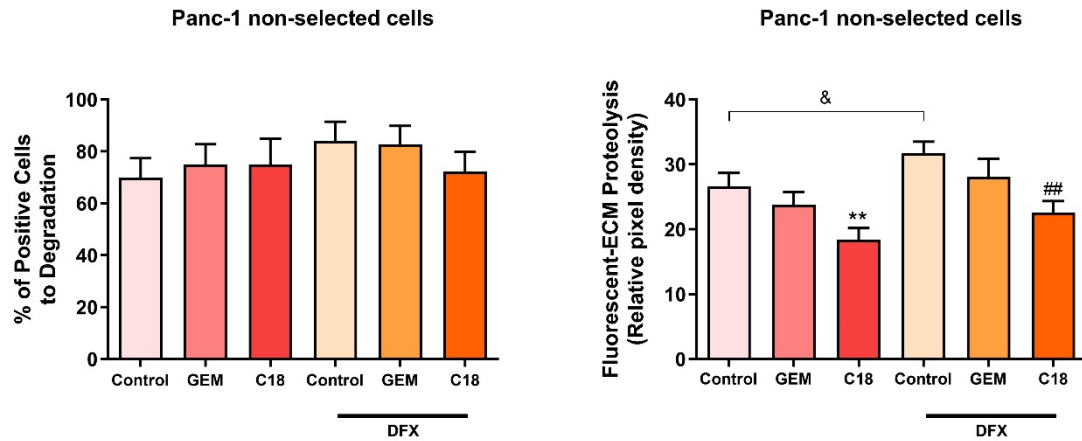

**B**

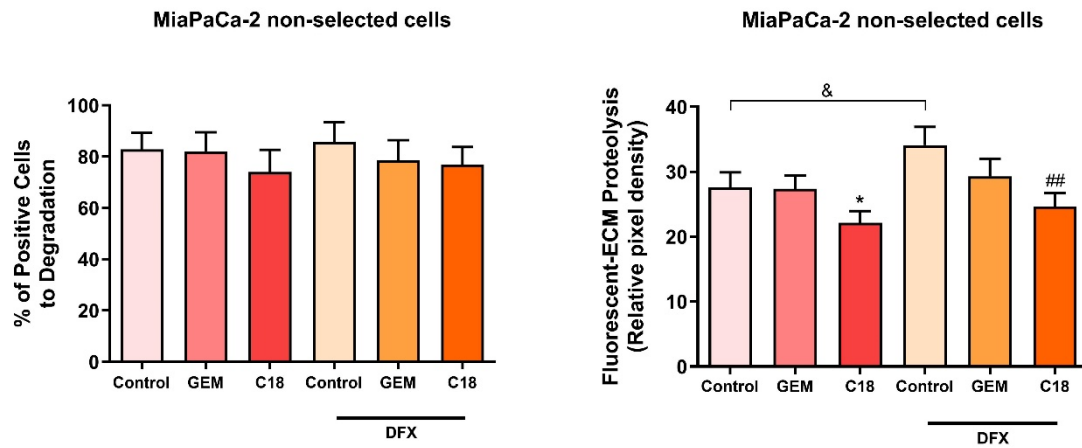

**Figure S5. Effect of GEM and C18 on the number of invadopodia-positive cells and their ECM-proteolytic activity/cell in non pH-selected Panc-1 cells (A) and MiaPaCa-2 cells (B) in normoxic and hypoxic conditions.** The percentage of invadopodia positive cells and their mean ECM degradation/cell was determined by fluorescence microscopy. Error bars indicate mean  $\pm$  S.E.M (n=3). \*  $p < 0.05$ ; \*\*  $p < 0.01$  when compared with control; ##  $p < 0.01$  when compared with DFX group; &  $p < 0.05$  when compared within the same treatment between the presence or absence of hypoxia.

**A**

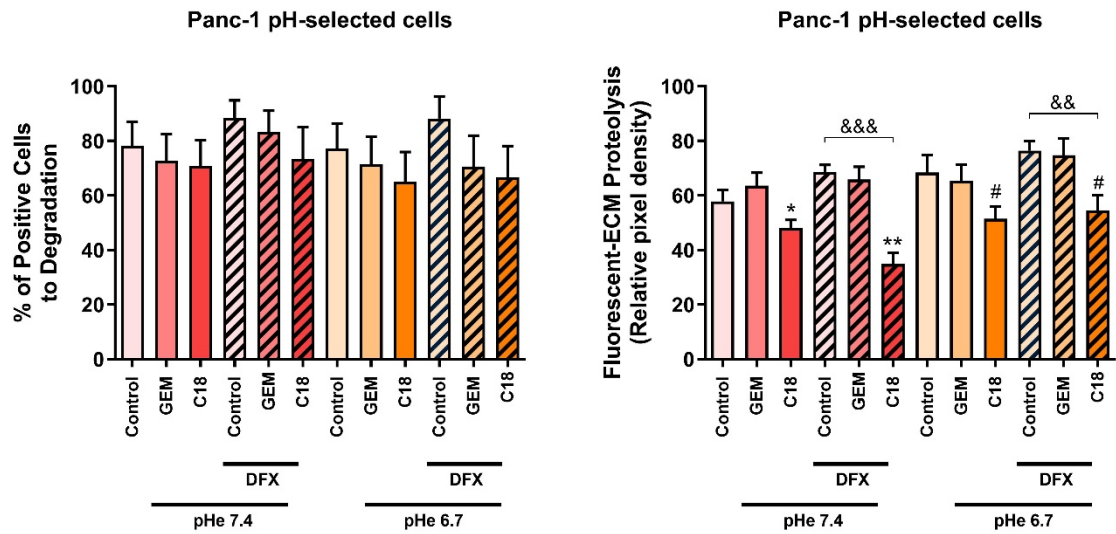

**B**

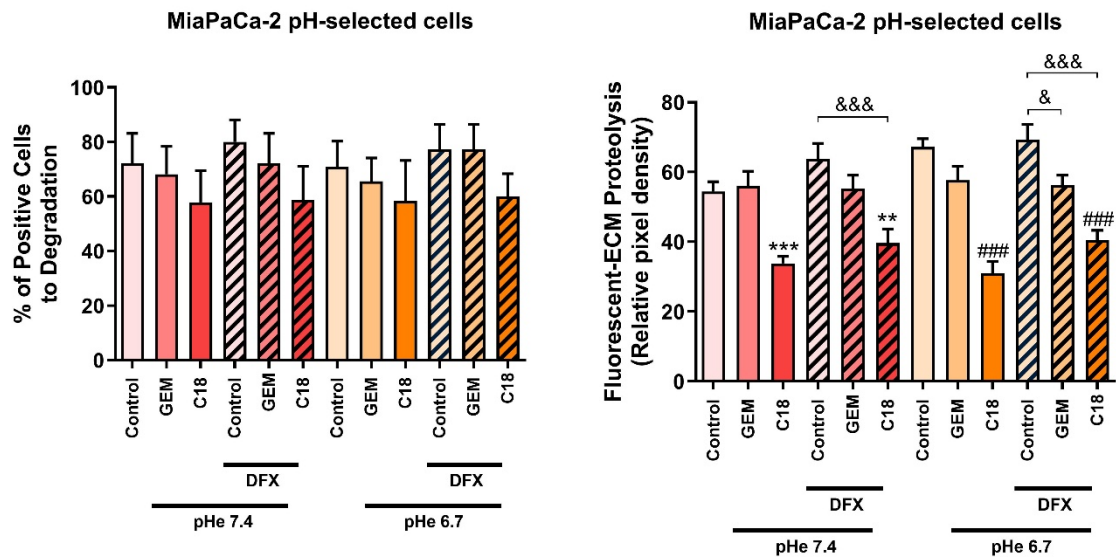

**Figure S6. Effect of both GEM and C18 on the number of invadopodia-positive cells and their ECM-proteolytic activity/cell in Panc-1 pH-selected cells (A) and MiaPaCa-2 pH-selected cells (B) in normoxic and DFX (200 $\mu$ M)-induced hypoxic conditions.** The percentage of cells forming invadopodia and their ECM degradation were determined by fluorescence microscopy. Error bars indicate mean  $\pm$  S.E.M (n=3). \*  $p < 0.05$ ; \*\*  $p < 0.01$ ; \*\*\*  $p < 0.001$  when compared with control pH<sub>e</sub> 7.4; #  $p < 0.05$ ; ###  $p < 0.001$  when compared with control pH<sub>e</sub> 6.7; &  $p < 0.05$ ; &&  $p < 0.001$ ; &&&  $p < 0.001$  when compared within the same pH<sub>e</sub> between normoxic and hypoxic condition.
